# Supplementary material for: Lamellar structured Ni3P2O8: first-ever use to design 1.8 V operated flexible all-solid-state symmetric supercapacitor
Source: Royal Society of Chemistry journal article supplement (doi:10.1039/d2dt02505a), 2022-01-01
Supplement: d2dt02505a1.pdf [file d2dt02505a1.pdf]

# **Lamellar structured $\text{Ni}_3\text{P}_2\text{O}_8$ : First-ever use to design 1.8 V operated flexible all-solid-state symmetric supercapacitor**

Akanksha Agarwal, Babasaheb R. Sankapal\*

Department of Physics, Visvesvaraya National Institute of Technology, South Ambazari Road, Nagpur-440010, Maharashtra, India.

---

## **Supporting information S1**

### **Tixo-tape peel off test**

Using the tixo-tape peel-off method, the adherence of the  $\text{Ni}_3\text{P}_2\text{O}_8$  thin film was evaluated [1]. For this, tixo-tape was put to the top surface of the film and then peeled off. Peel-off photos of the film on the stainless steel (SS) substrate reveal that just a few non-adhesive powdery particles were eliminated from the surface with no significant change. This indicates that the film adhered firmly to the SS substrate.

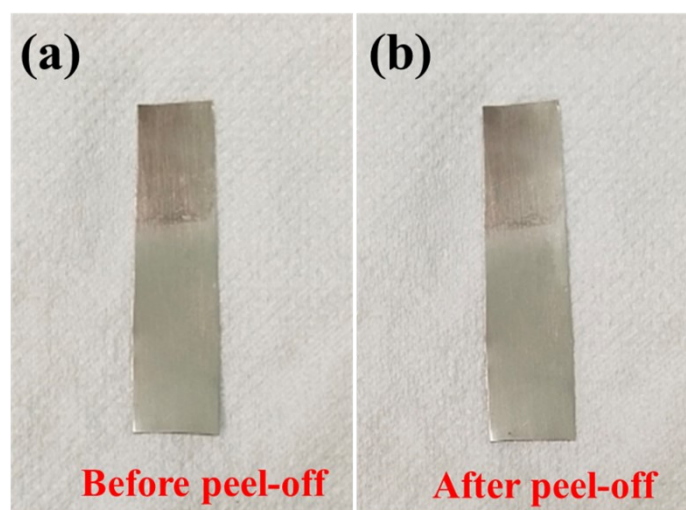

Figure: S1 Photographs of the  $\text{Ni}_3\text{P}_2\text{O}_8$  thin film (a) before, and (b) after peel-off, respectively.

## **Supporting information S2**

### **Materials characterization**

X-ray diffractometer (XRD, Rigaku, SmartLab) with Cu  $k_{\alpha}$  radiation ( $\lambda=1.54 \text{ \AA}$ ) was employed to identify the phase and purity of the as-prepared composite  $\text{Ni}_3\text{P}_2\text{O}_8$  thin film. With the aid of Thermo scientific Inc., UK, X-ray photoelectron spectroscopy (XPS) measurements were performed using Al as the source of excitation. Field emission scanning electron microscopy (FE-SEM, JSM-7800F, JEOL) with energy dispersive x-ray spectroscopy (EDS; Oxford, x-max) was used to study surface morphological properties. The JEOL JEM-2100F apparatus was adopted to acquire the high-resolution transmission electron micrographs (HRTEM). To estimate the Brunauer-Emmett-Teller (BET) surface area and pore-size distribution, the nitrogen adsorption-desorption isotherms were recorded on ASAP 2010, Micromeritics.

### **Electrochemical studies**

Various electrochemical analysis techniques such as, cyclic voltammetry (CV), galvanostatic charge discharge (GCD), and electrochemical impedance spectroscopy (EIS) were employed to examine the electrochemical properties of designed  $\text{Ni}_3\text{P}_2\text{O}_8$  electrode. The electrode studies of as-designed binder-free electrode were performed via conventional tri-electrode configuration with Ag/AgCl and platinum wire as reference and counter electrodes, respectively.

### **Calculations performed**

The specific capacitance ( $C_s$ ) of the electrode was estimated using CV curves at various scan rates, as follows;

$$C_s (F g^{-1}) = \frac{\int i(V) dV}{m v V} \quad (1)$$

While, the areal capacitance ( $C_a$ ) of the electrode from CV curves at various scan rates was estimated using below;

$$C_a (F cm^{-2}) = \frac{\int i(V) dV}{A v V} \quad (2)$$

where,  $\int i(V) dV$  stands for CV integral area, m denotes mass loading, v signifies scan rate, and V represents active potential window of electrode.

Meanwhile, the  $C_s$  and  $C_a$  values at different current densities derived from GCD curves can be computed as follows;

$$C_s (F g^{-1}) = \frac{I \int V dt}{m V^2} \quad (3)$$

$$C_a (F cm^{-2}) = \frac{I \int V dt}{A V^2} \quad (4)$$

here,  $\int V dt$  accounts for the area under galvanostatic discharge curve and I is the discharge current density.

The  $C_s$  and  $C_a$  values of the  $Ni_3P_2O_8$  symmetric device can be evaluated from above eqns. with mass loading as 2m. Subsequently, energy density (E) and power density (P) calculations were based on following eqns.;

$$E (Wh\ kg^{-1}) = \frac{0.5\ C_s V^2}{3.6} \quad (5)$$

$$P (W\ kg^{-1}) = \frac{3600\ E}{\Delta t} \quad (6)$$

where,  $\Delta t$  stands for discharge time.

### Supporting information S3

#### Concentration optimization of $Na_2SO_4$ electrolyte

The effects of increasing the  $Na_2SO_4$  concentration from 0.5 to 2 M are explored via CV measurement at a constant scan rate of  $100\ mV\ s^{-1}$ , as shown in Fig. S2(a). Fig. S2(b) depicts the corresponding specific capacitance values obtained at various  $Na_2SO_4$  concentrations with 1 M  $Na_2SO_4$  exhibiting the largest value of specific capacitance ( $221\ F\ g^{-1}$ ). At this concentration, ion species are not only abundant but also in a stable state (in terms of activity), resulting in efficient double layer formation [2]. As a result, 1 M  $Na_2SO_4$  is determined to be the best electrolyte formulation for electrochemical characterization of the as-prepared  $Ni_3P_2O_8$  thin film electrode.

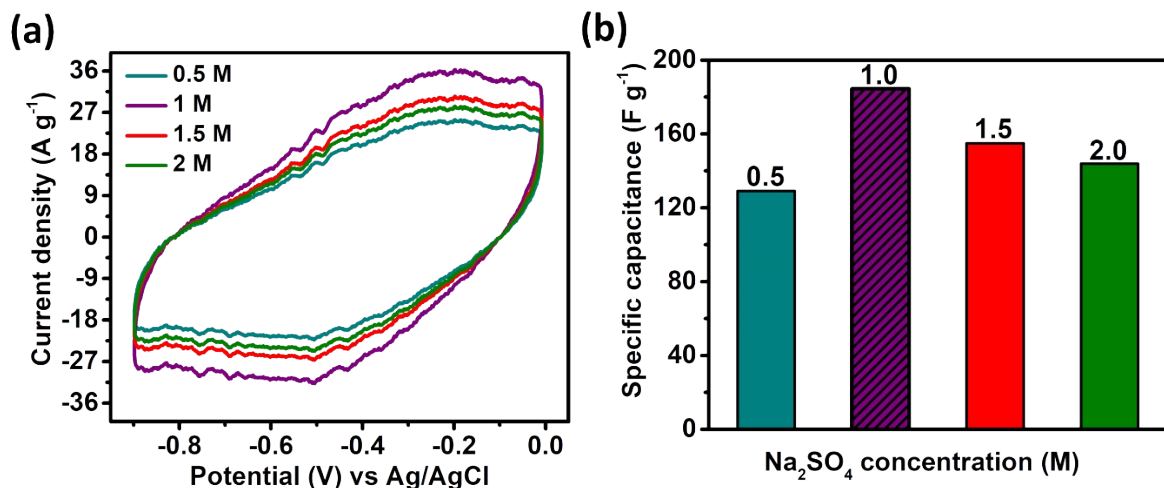

Figure: S2 (a) CV curves of  $Ni_3P_2O_8$  electrode for different  $Na_2SO_4$  concentrations, and (b) variation of specific capacitance with different  $Na_2SO_4$  concentrations.



## Supporting information S4

### Distributions of diffusion-controlled and capacitive type current response at different scanning speeds

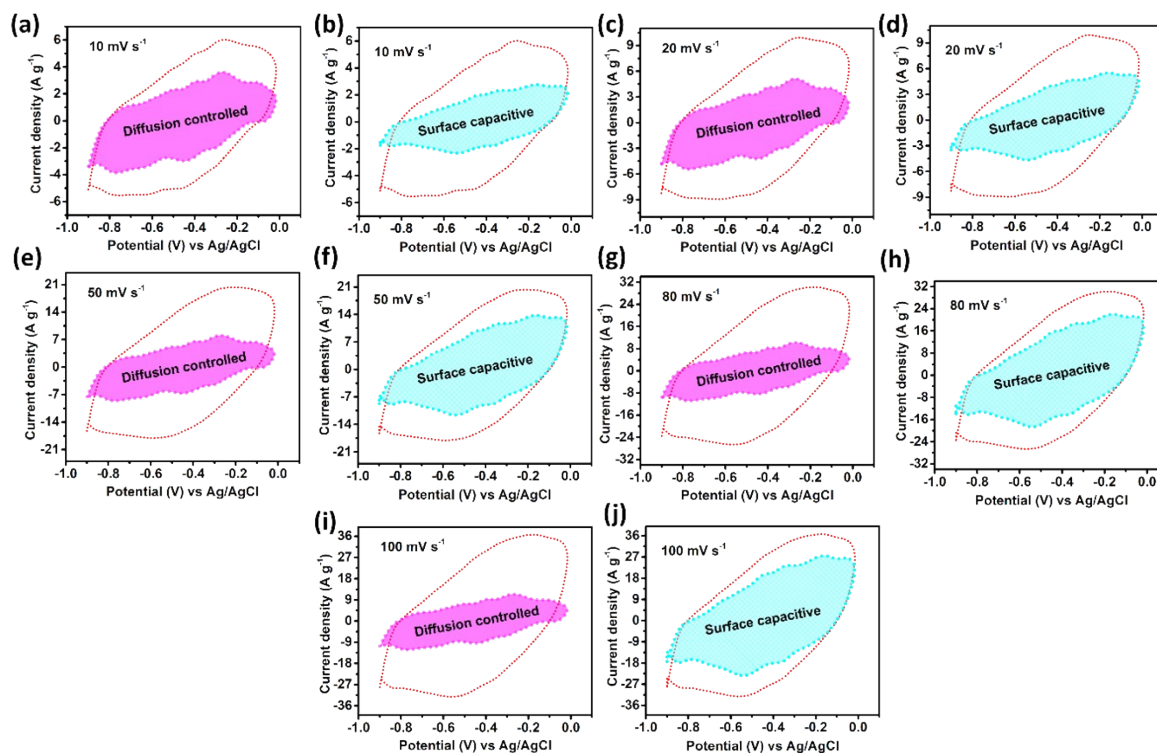

Figure: S3 Distributions of diffusion-controlled and surface-capacitive type current responses at different scanning speeds.

## Supporting information S5

### Device assembly

Solid-state carboxy methyl cellulose- $\text{Na}_2\text{SO}_4$  (CMC- $\text{Na}_2\text{SO}_4$ ) electrolyte membrane was used to stack two identical  $\text{Ni}_3\text{P}_2\text{O}_8$  electrodes within a device assembly. At the first, a homogeneous mixture of 1 g  $\text{Na}_2\text{SO}_4$ , 2 g CMC, and 30 mL DDW was prepared at the temperature of 90 °C. Then evenly poured into a petri dish to obtain a solid-state free-standing CMC- $\text{Na}_2\text{SO}_4$  flexible membrane after overnight drying. Further, two  $\text{Ni}_3\text{P}_2\text{O}_8$  thin film electrodes were placed on top of one another with as-prepared CMC- $\text{Na}_2\text{SO}_4$  electrolyte

membrane in between. The entire assembly was then normally pressed to realize all-solid-state  $\text{Ni}_3\text{P}_2\text{O}_8//\text{CMC-Na}_2\text{SO}_4//\text{Ni}_3\text{P}_2\text{O}_8$  supercapacitor.

### Supporting information S6

Table S1: EIS equivalent circuit parameters of flexible all-solid-state symmetric  $\text{Ni}_3\text{P}_2\text{O}_8$  device.

| Parameters | $R_s (\Omega \text{ cm}^{-2})$ | $R_{ct} (\Omega \text{ cm}^{-2})$ | $C_{dl} (\mu\text{F cm}^{-2})$ | W     |
|------------|--------------------------------|-----------------------------------|--------------------------------|-------|
| Value      | 0.65                           | 2.23                              | 1.36                           | 52.83 |

### References

- [1] Bidhan Pandit, Akanksha Agarwal, Priyanka Patel, “Electrochemical kinetics of cerium selenide nano-pebbles: Design of device grade symmetric configured wide-potential flexible solid-state supercapacitor,” *Nanoscale Adv.*, pp. 814–823, 2021, doi: 10.1039/D0NA00893A.
- [2] K. C. Tsay, L. Zhang, and J. Zhang, “Effects of electrode layer composition/thickness and electrolyte concentration on both specific capacitance and energy density of supercapacitor,” *Electrochim. Acta*, vol. 60, pp. 428–436, 2012, doi: 10.1016/j.electacta.2011.11.087.
